# Supplementary material
Source: PubMed Central journal article supplement (PMC4154536)
Supplement: NIHMS621069-supplement-Supplemental_Figure_1.pdf [file NIHMS621069-supplement-Supplemental_Figure_1.pdf]

## Supplemental Figure 1

Bayat et al. *J Immunol* 184:3889, 2010

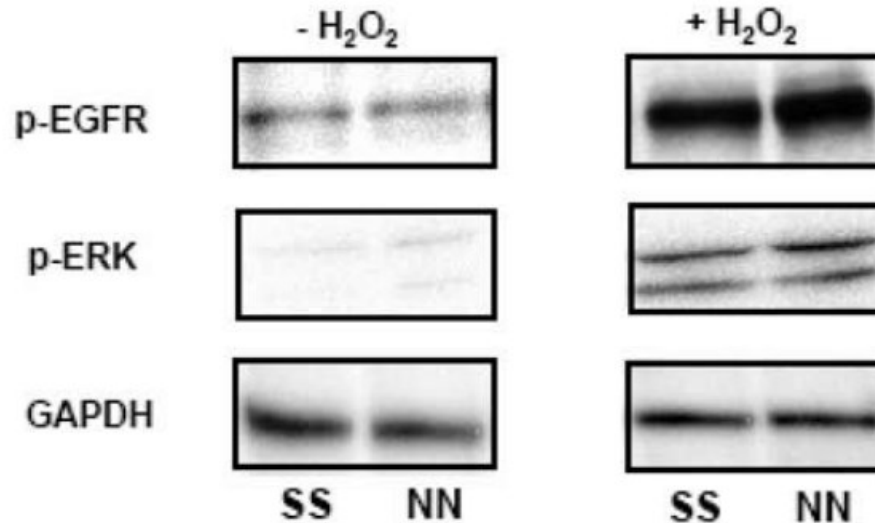

Supplemental Figure 1: Immunoblot analysis of EGFR and ERK phosphorylation in PECAM-1 phenotyped HUVEC. Homozygous PECAM-1 NN or SS HUVEC was stimulated with H<sub>2</sub>O<sub>2</sub>. After lysis, aliquots of protein (5 µg) were run on 10% SDS-PAGE and were analyzed by immunoblotting using mAb against phosphorylated EGFR pY1173 (2.5 µg/ml) or ERK pT202/Y204 (2.5 µg/ml), or against GAPDH (2.5 µg/ml)
